# Supplementary material
Source: publisher figshare collection journal article supplement (https://acs.figshare.com/ndownloader/files/9420175)
Supplement: Supplementary file 1 [file 9420175]

## Supporting Information for

### Phase Behavior of Methane-Ethane Mixtures in Nanopores

T. Pitakbunkate<sup>1</sup>, T. A. Blasingame<sup>1</sup>, and G. J. Moridis<sup>1</sup>, and P. B. Balbuena<sup>2</sup>  
<sup>1</sup>Department of Petroleum Engineering, <sup>2</sup>Department of Chemical Engineering  
Texas A&M University, College Station, TX 77843

e-mail: [balbuena@tamu.edu](mailto:balbuena@tamu.edu)

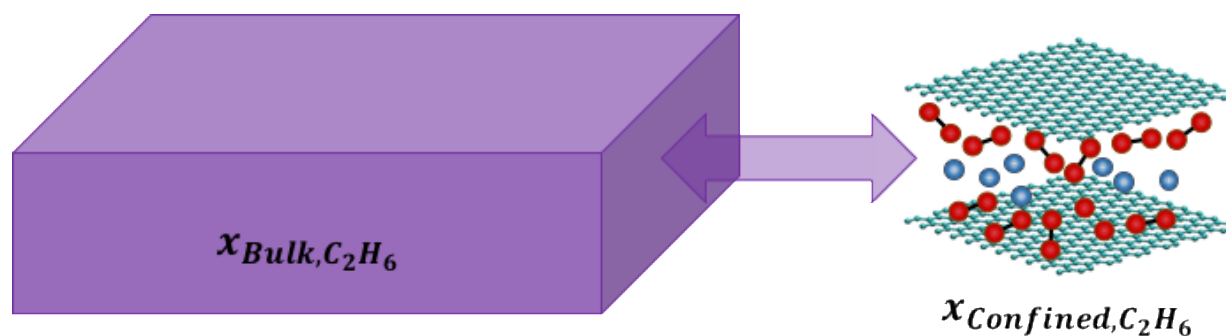

Figure S1 – Schematic of GCMC simulation of a methane-ethane mixture system.
